# Supplementary material for: Switch from sexual to parthenogenetic reproduction in a zebra shark
Source: PubMed Central journal article supplement (PMC5238396; doi:10.1038/srep40537), 2017-01-16
Supplement: srep40537-s1.pdf [file srep40537-s1.pdf]

## Switch from sexual to parthenogenetic reproduction in a zebra shark

Christine L Dudgeon<sup>1</sup> \*

Laura Coulton<sup>2</sup>

Ren Bone<sup>2</sup>

Jennifer R Ovenden<sup>1</sup>

Severine Thomas<sup>2,3</sup>

<sup>1</sup>The University of Queensland, Molecular Fisheries Laboratory, School of Biomedical Sciences, St. Lucia Queensland, 4072, Australia.

<sup>2</sup>Reef HQ Aquarium, Townsville, Australia.

<sup>3</sup>College of Marine and Environmental Sciences, James Cook University, Townsville, 4811, Queensland, Australia

\*Corresponding Author

Email: [c.dudgeon@uq.edu.au](mailto:c.dudgeon@uq.edu.au)

**Supplementary Table.** The mother shark F1 is presented first, followed by the putative sire M1 and the sexually produced adult offspring F2. The three deceased juvenile sharks from the final sexual breeding encounter are shown with the date 2013:1 – 3. The parthenogenetic offspring from F1 are shown with the dates 2015:1-3 and 2016:1-4. The parthenogenetic offspring from F2 is shown in row 2016:5. Ind. = individual.

| Ind.         | Description                  | Parent/s | SF41 |     | SF138 |     | Sfa205 |     | Sfa382 |     | Sfa454 |     |
|--------------|------------------------------|----------|------|-----|-------|-----|--------|-----|--------|-----|--------|-----|
| F1           | Mother                       |          | 208  | 222 | 176   | 178 | 360    | 372 | 174    | 182 | 189    | 201 |
| M1           | Father                       |          | 208  | 220 | 176   | 180 | 356    | 360 | 182    | 186 | 199    | 201 |
| F2<br>(2009) | Sexual<br>offspring          | F1 & M1  | 220  | 222 | 176   | 180 | 356    | 372 | 174    | 182 | 189    | 199 |
| 2013:1       | Sexual<br>offspring          | F1 & M1  | 208  | 208 | 178   | 180 | 356    | 372 | 182    | 186 | 189    | 201 |
| 2013:2       | Sexual<br>offspring          | F1 & M1  | 208  | 222 | 176   | 180 | 356    | 372 | 182    | 186 | 201    | 201 |
| 2013:3       | Sexual<br>offspring          | F1 & M1  | 208  | 220 | 176   | 180 | 356    | 372 | 182    | 182 | 189    | 201 |
| 2015:1       | Parthenogenetic<br>offspring | F1       | 208  | 208 | 178   | 178 | 372    | 372 | 174    | 174 | 201    | 201 |
| 2015:2       | Parthenogenetic<br>offspring | F1       | 208  | 208 | 178   | 178 | 372    | 372 | 182    | 182 | 201    | 201 |
| 2015:3       | Parthenogenetic<br>offspring | F1       | 208  | 208 | 176   | 176 | 372    | 372 | 174    | 174 | 189    | 189 |
| 2015:4       | Parthenogenetic<br>offspring | F1       | 208  | 208 | 178   | 178 | 372    | 372 | 182    | 182 | 189    | 189 |
| 2016:1       | Parthenogenetic<br>offspring | F1       | 222  | 222 | 178   | 178 | 360    | 360 | 174    | 174 | 189    | 189 |
| 2016:2       | Parthenogenetic<br>offspring | F1       | 222  | 222 | 178   | 178 | 372    | 372 | 182    | 182 | 201    | 201 |
| 2016:3       | Parthenogenetic<br>offspring | F1       | 208  | 208 | 178   | 178 | 360    | 360 | 182    | 182 | 189    | 189 |
| 2016:4       | Parthenogenetic<br>offspring | F1       | 222  | 222 | 178   | 178 | 360    | 360 | 182    | 182 | 201    | 201 |
| 2016:5       | Parthenogenetic<br>offspring | F2       | 222  | 222 | 176   | 176 | 372    | 372 | 182    | 182 | 189    | 189 |
